# Supplementary material for: Highly efficient removal of Cs+from water by an ionic lamellar carbon nitride framework
Source: Royal Society of Chemistry journal article supplement (doi:10.1039/d3ta00811h), 2023-01-01
Supplement: d3ta00811h1.pdf [file d3ta00811h1.pdf]

## Supplementary Information

### Highly Efficient Removal of Cs<sup>+</sup> from Water by Ionic Lamellar Carbon Nitride Framework

Zhenchun Yang,<sup>a</sup> Bixiao Guo,<sup>b</sup> Zhenyu Hu,<sup>a</sup> Jiahao Cui,<sup>a</sup> Jianguo Cui,<sup>c</sup> Lina Li,<sup>a</sup> Chun Hu,<sup>a</sup>

Yubao Zhao<sup>a, \*</sup>

<sup>a</sup> Key Laboratory for Water Quality and Conservation of the Pearl River Delta, Ministry of Education, Institute of Environmental Research at Greater Bay, Guangzhou University, 510006 Guangzhou, P. R. China

<sup>b</sup> Department of Environmental Science and Engineering, Guangzhou University, 510006 Guangzhou, P. R. China

<sup>c</sup> Baotou Research Institute of Rare Earths, 014030 Baotou, P. R. China.

\* Email: [ybzhao@gzhu.edu.cn](mailto:ybzhao@gzhu.edu.cn) (Y. Zhao)

## Table of Content

|                                                |     |
|------------------------------------------------|-----|
| Cs <sup>+</sup> removal via ion exchange ..... | S3  |
| Kinetic curves models.....                     | S3  |
| Absorption isotherm models.....                | S4  |
| Characterizations.....                         | S5  |
| Theoretical simulations .....                  | S5  |
| Figure S1. ....                                | S6  |
| Figure S2. ....                                | S7  |
| Figure S3. ....                                | S8  |
| Figure S4. ....                                | S9  |
| Figure S5. ....                                | S10 |
| Figure S6. ....                                | S11 |
| Figure S7. ....                                | S12 |
| Table S1. ....                                 | S13 |
| Table S2. ....                                 | S14 |
| Table S3. ....                                 | S15 |
| Table S4. ....                                 | S16 |
| References.....                                | S17 |

## Cs<sup>+</sup> removal via ion exchange

In the kinetic studies, 20 mg of CN-Na was dispersed in 40 mL of CsCl solution with concentration of 0.5 mM and magnetically stirred at room temperature. The solution was sampled at specified time intervals (0, 5, 10, 15, 20, 30, 45, 60, 90, 120 min). The solid sample was separated from the liquid phase by PTEF syringe filter. The concentrations of Cs<sup>+</sup> in the liquid phase were analyzed by inductively coupled plasma-optical emission spectroscopy (ICP-OES).

*Absorption isotherm measurement.* 20 mg of CN-Na was mixed with 40 mL aqueous solution with a series of Cs<sup>+</sup> concentrations (0.01 mM ~ 5 mM) and magnetically stirred for 2 h at room temperature to reach the absorption equilibrium. The concentration of Cs<sup>+</sup> remaining in the liquid phase was analyzed by ICP-OES.

*Cs<sup>+</sup> removal by CN-Na in ion-exchange column.* 1g CN-Na was loaded in a glass column. The solution with Cs<sup>+</sup> concentration of 0.5 mM was pumped into the ion-exchange column at the flow rate of 0.5 mL min<sup>-1</sup> by a peristaltic pump. The concentration of Cs<sup>+</sup> in the effluent was determined by ICP-OES.

*Regeneration of the ion-exchange column.* An aqueous NaCl solution with concentration of 10 wt.% was pumped into ion-exchange column to regenerate the column. The column was flushed with water before being applied in the next cycle ion exchange process to remove Cs<sup>+</sup>.

The remove rate  $R^{Cs}$  (%) is used to evaluate the removal efficiency of Cs<sup>+</sup>:

$$R^{Cs} = \frac{C_o - C_e}{C_o} \times 100\% \quad \text{eq. 1}$$

wherein  $C_o$  is the 0.5 mM (initial Cs<sup>+</sup> concentration),  $C_e$  is the Cs<sup>+</sup> concentration under absorption equilibrium in the ion exchange experiment.

## Kinetic curves models

Pseudo-first-order kinetics model:

$$\lg(q_e - q_t) = \lg q_e - \frac{k_1}{2.303}t$$

Pseudo-second-order kinetics model:

$$\frac{t}{q_t} = \frac{1}{k_2 q_e^2} + \frac{t}{q_e}$$

$q_e$  (with unit of  $\text{mg g}^{-1}$ ) is the ion exchange capacities under absorption equilibrium.  $q_t$  is ion exchange capacities at time  $t$  (with unit of  $\text{min}$ ).  $k_1$  (with unit of  $\text{min}^{-1}$ ) and  $k_2$  (with unit of  $\text{g mg}^{-1} \text{min}^{-1}$ ) are, respectively, the rate constants in the pseudo-first-order and pseudo-second-order kinetics models.

### Absorption isotherm models

Langmuir isotherm model:

$$q = q_m \frac{bC_e}{1 + bC_e}$$

$q_m$  (with unit of  $\text{mg g}^{-1}$ ) is the maximum ion exchange capacity,  $b$  (with unit of  $\text{L mg}^{-1}$ ) is the Langmuir constant,  $C_e$  (with unit of  $\text{mg L}^{-1}$ ) is the equilibrium concentration of  $\text{Cs}^+$  at ion exchange experiment.

Freundlich isotherm model:

$$q = K_F C_e^{1/n}$$

$K_F$  and  $1/n$  are the Freundlich constants,  $C_e$  (with unit of  $\text{mg L}^{-1}$ ) is the equilibrium concentrations in the ion exchange experiment.

Langmuir-Freundlich isotherm model:

$$q = q_m \frac{(bC_e)^{1/n}}{1 + (bC_e)^{1/n}}$$

$q_m$  (with unit of  $\text{mg g}^{-1}$ ) is the maximum ion exchange capacity,  $b$  (with unit of  $\text{L mg}^{-1}$ ) is the Langmuir constant,  $C_e$  (with unit of  $\text{mg L}^{-1}$ ) is the equilibrium concentrations of  $\text{Cs}^+$  in the ion exchange experiment.  $1/n$  is the Freundlich constant.

### Characterizations

The morphology of the materials was characterized by transmission electron microscopy (JEOL 2100F). X-ray diffraction patterns of the materials were obtained on a PANalytical PW3040/60 diffractometer with Cu radiation ( $\text{Cu K}\alpha = 0.15406 \text{ nm}$ ). X-ray photoelectron spectroscopy (XPS) patterns were recorded on an ESCA laboratory 220i-XL spectrometer with an Al  $\text{K}\alpha$  (1486.6 eV) X-ray source and a charge neutralizer; all the binding energy were calibrated to C 1s peak at 284.8 eV. Infrared spectrometry of the materials was measured on the Thermo scientific Nicolet IS50 ATR FT-IR. The surface charge state of sample was measured on Zeta potential analyzer ELSZ-2000Z.

### Theoretical simulations

The theoretical simulation was performed by using the Vienna ab initio Simulation Program (VASP). The generalized gradient approximation (GGA) in the Perdew-Burke-Ernzerhof (PBE) form and a cutoff energy of 500 eV for planewave basis set were used. A  $5 \times 5 \times 1$  Monkhorst-Pack k grid was employed for sampling the Brillouin zones at structure calculation. The ion-electron interactions were analyzed via the method of the projector augmented wave (PAW). The convergence criteria of structure optimization were selected as the maximum force on each atom less than  $0.02 \text{ eV}/\text{\AA}$  with an energy change less than  $1 \times 10^{-5} \text{ eV}$ .

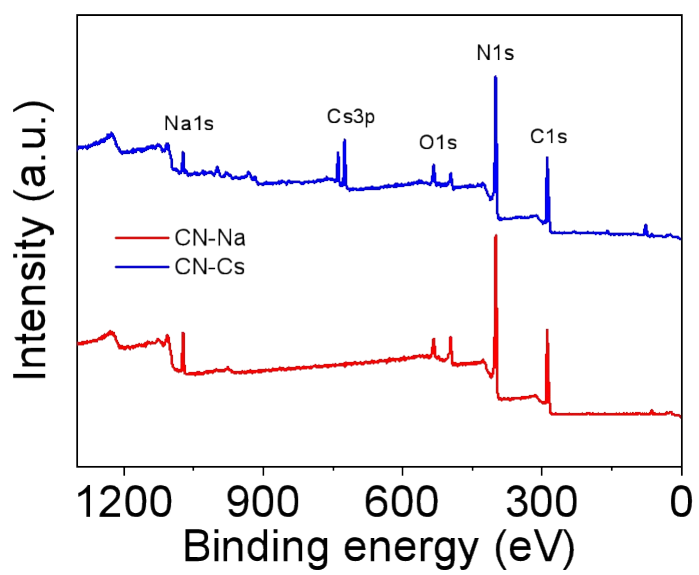

**Figure S1.** XPS survey scans on CN-Na and CN-Cs.

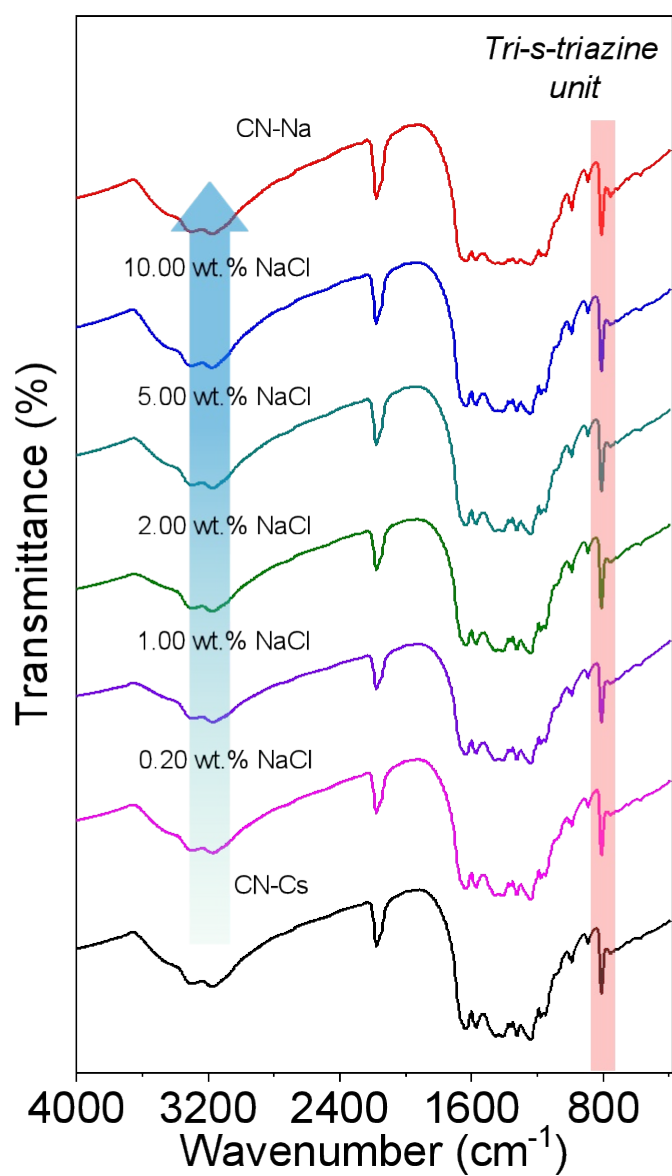

**Figure S2.** FT-IR spectra investigations on CN-Cs to CN-Na recovery.

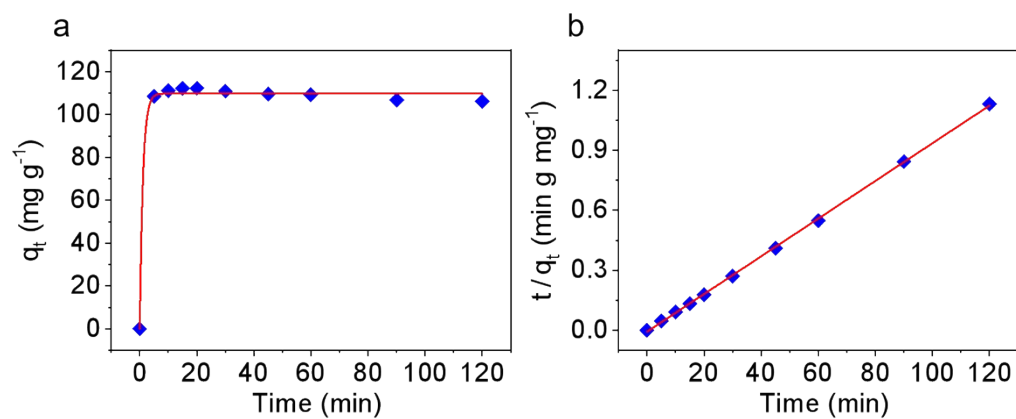

**Figure S3.** Kinetic fitting of the Cs<sup>+</sup> absorption process. (a) Pseudo-first-order and (b) pseudo-second-order kinetics models fitted curves for the data of Cs ion exchange by CN-Na.



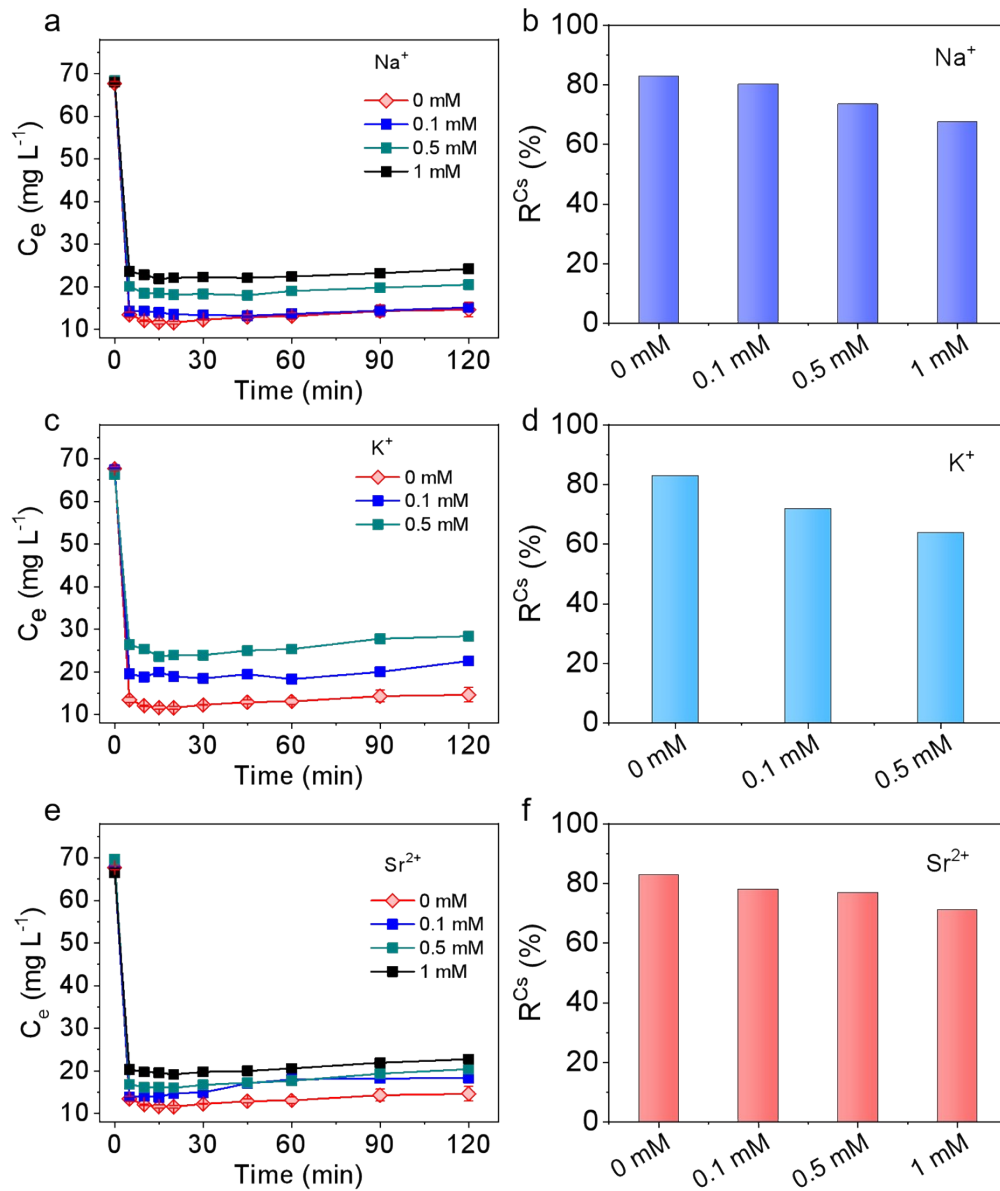

**Figure S4.**  $\text{Cs}^+$  removal performance of CN-Na in the presence of  $\text{Na}^+$ ,  $\text{K}^+$ , and  $\text{Sr}^{2+}$ .

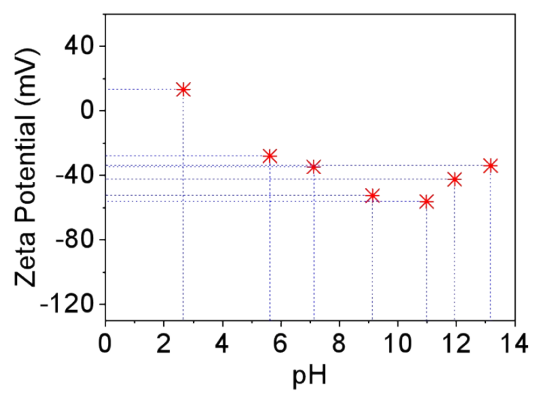

**Figure S5.** Zeta potential of CN-Na in the solution at a series of pH.

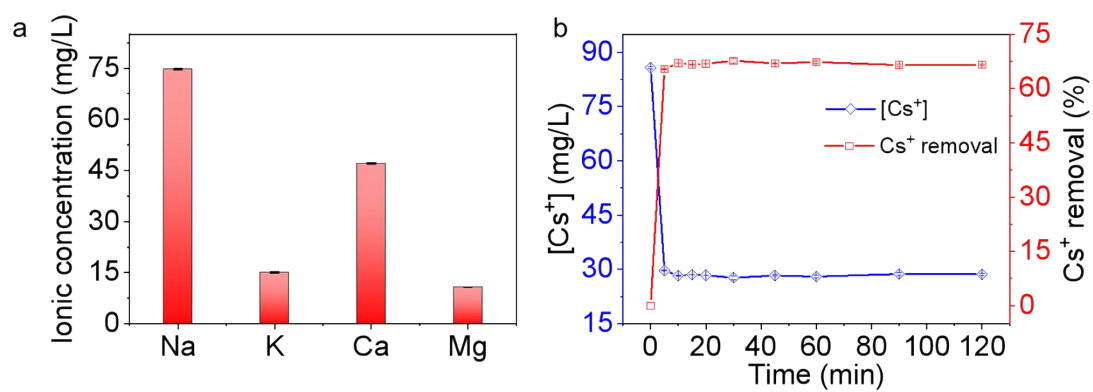

**Figure S6.** (a) The ionic concentration of Na, K, Ca and Mg in actual water from the Pearl River (Guangzhou, P. R. China). (b) Kinetic plots of the Cs<sup>+</sup> uptake by CN-Na in actual water. Initial [Cs<sup>+</sup>] = 85.8 mg L<sup>-1</sup>.

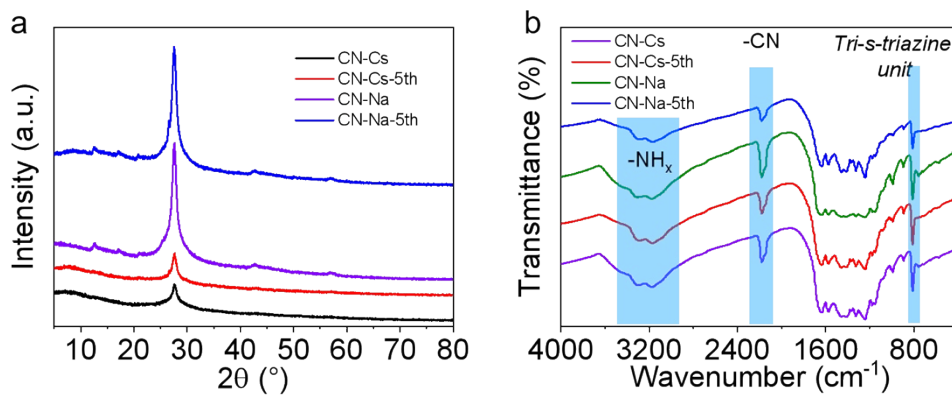

**Figure S7.** Comparison of the recycled materials with the pristine ones. (a) X-ray diffraction (XRD) patterns, (b) Fourier-transform Infra-red (FT-IR) spectra.

**Table S1.** Comparison of Cs<sup>+</sup> remove efficiency of CN-Na with the other adsorbents.

| Sample                                                                                                                                          | Absorbent loading (g L <sup>-1</sup> ) | [Cs <sup>+</sup> ] (mg L <sup>-1</sup> ) | Equilibrium time (min) | Removal efficiency (%) | Ref.      |
|-------------------------------------------------------------------------------------------------------------------------------------------------|----------------------------------------|------------------------------------------|------------------------|------------------------|-----------|
| CN-Na                                                                                                                                           | 0.5                                    | 65                                       | 5                      | 80.1                   | This work |
| [(CH <sub>3</sub> ) <sub>2</sub> NH <sub>2</sub> ] <sub>4</sub> [(UO <sub>2</sub> ) <sub>4</sub> (TBAPy) <sub>3</sub> ]·2DMF·37H <sub>2</sub> O | 1                                      | 1                                        | 20                     | 89.0                   | 1         |
| AAC                                                                                                                                             | 0.7                                    | 100                                      | 1440                   | 58.0                   | 2         |
| SAC                                                                                                                                             | 0.7                                    | 100                                      | 1440                   | 63.0                   |           |
| AgSnSe-1                                                                                                                                        | 1                                      | 6                                        | 60                     | 70.1                   | 3         |
| FJSM-InMOF                                                                                                                                      | 0.4                                    | 90                                       | 60                     | 83.0                   | 4         |
| DGIST-2'→methanol                                                                                                                               | 0.66                                   | 115                                      | 15                     | 57.9                   | 5         |
| FJSM-SnS-4                                                                                                                                      | 1                                      | 11.2                                     | 2                      | 60.71                  | 6         |
|                                                                                                                                                 |                                        |                                          | 30                     | 78.57                  |           |
| FJSM-SnS/PAN                                                                                                                                    | 1                                      | 9.32                                     | 10                     | 55.26                  | 7         |
|                                                                                                                                                 |                                        |                                          | 90                     | 77.25                  |           |
| FJSM-SnS-2                                                                                                                                      | 1                                      | 0.73                                     | 60                     | 83.0                   | 8         |
| FJSM-SnS-3                                                                                                                                      | 1                                      | 0.778                                    | 60                     | 75.0                   |           |
| FJSM-SbS                                                                                                                                        | 1                                      | 0.6168                                   | 2                      | 86.93                  | 9         |
| [(CH <sub>3</sub> ) <sub>2</sub> NH <sub>2</sub> ]In(aip) <sub>2</sub> ·DMF·H <sub>2</sub> O                                                    | 1                                      | 6.5                                      | 1                      | 92.92                  | 10        |
| [(CH <sub>3</sub> ) <sub>2</sub> NH <sub>2</sub> ]In(hip) <sub>2</sub> ·DMF·H <sub>2</sub> O                                                    | 1                                      | 3.9                                      | 1                      | 89.23                  |           |
| InSnS-1 (Nature)                                                                                                                                | 1                                      | 3.44                                     | 5                      | 91.28                  | 11        |
| InSnS-1 (1 M HNO <sub>3</sub> )                                                                                                                 | 1                                      | 4.3                                      | 20                     | 82.33                  |           |
| KIAS                                                                                                                                            | 1                                      | 2.05                                     | 1                      | 92.98                  | 12        |
| SbS-1K                                                                                                                                          | 1                                      | 6                                        | 2                      | 93.29                  | 13        |
|                                                                                                                                                 |                                        |                                          | 5                      | 97.40                  |           |

**Table S2.** Kinetic fitting parameters of the Cs<sup>+</sup> absorption process by CN-Na .

| CN-Na | Pseudo-first-order model   |                             |                | Pseudo-second-order model                     |                             |                |
|-------|----------------------------|-----------------------------|----------------|-----------------------------------------------|-----------------------------|----------------|
|       | $k_1$ (min <sup>-1</sup> ) | $q_m$ (mg g <sup>-1</sup> ) | R <sup>2</sup> | $k_2$ (g mg <sup>-1</sup> min <sup>-1</sup> ) | $q_m$ (mg g <sup>-1</sup> ) | R <sup>2</sup> |
|       | 0.8877                     | 109.80                      | 0.9961         | 0.01273                                       | 106.16                      | 0.9997         |

**Table S3.** Parameters of the fitting based on Langmuir, Freundlich and Langmuir-Freundlich models.

| <b>Model</b>               | <b>Parameter</b>            | <b>Value</b> |
|----------------------------|-----------------------------|--------------|
| <b>Langmuir</b>            | $q_m$ (mg g <sup>-1</sup> ) | 241.25       |
|                            | $b$ (L mg <sup>-1</sup> )   | 0.0516       |
|                            | $R^2$                       | 0.974        |
| <b>Freundlich</b>          | $K_F$                       | 55.88        |
|                            | $n$                         | 4.08         |
|                            | $R^2$                       | 0.932        |
| <b>Langmuir-Freundlich</b> | $q_m$ (mg g <sup>-1</sup> ) | 278.20       |
|                            | $b$ (L mg <sup>-1</sup> )   | 0.0362       |
|                            | $n$                         | 1.565        |
|                            | $R^2$                       | 0.993        |

**Table S4.** Compared the Cs ion exchange capacity of CN-Na with other adsorbents.

| Sample                                                                                          | pH                 | Temperature      | $q_m$<br>( $\text{mg g}^{-1}$ ) | Ref.      |
|-------------------------------------------------------------------------------------------------|--------------------|------------------|---------------------------------|-----------|
| CN-Na                                                                                           | 9.8                | Room temperature | 278.2                           | This work |
| AAC                                                                                             | 6.0                | Room temperature | 362                             | 2         |
| SAC                                                                                             | 6.0                | Room temperature | 259                             |           |
| AgSnSe-1                                                                                        | \                  | Room temperature | 174.4                           | 3         |
| FJSM-InMOF                                                                                      | \                  | Room temperature | 198.63                          | 4         |
| DGIST-2'→methanol                                                                               | \                  | \                | 183                             |           |
| DGIST-3-S                                                                                       | \                  | \                | 156                             | 5         |
| DGIST-2'→water                                                                                  | \                  | \                | 164                             |           |
|                                                                                                 | 7.1                | 298 K            | 388.94                          |           |
| FJSM-SnS-4                                                                                      | 0.4                | 298 K            | 137.07                          | 6         |
|                                                                                                 | 1.6                | 298 K            | 167.72                          |           |
|                                                                                                 | 7.1                | Room temperature | 296.12                          |           |
| FJSM-SnS/PAN                                                                                    | 2.5                | Room temperature | 89.29                           | 7         |
| FJSM-SnS-2                                                                                      | 3.2-9.3            | \                | 266.54                          |           |
| FJSM-SnS-3                                                                                      | 3.2-9.3            | \                | 109.68                          | 8         |
| FJSM-SbS                                                                                        | \                  | 353 K            | 146.12                          | 9         |
| $[(\text{CH}_3)_2\text{NH}_2]\text{In}(\text{aip})_2 \cdot \text{DMF} \cdot \text{H}_2\text{O}$ | \                  | Room temperature | 297.67                          |           |
|                                                                                                 |                    |                  |                                 | 10        |
| $[(\text{CH}_3)_2\text{NH}_2]\text{In}(\text{hip})_2 \cdot \text{DMF} \cdot \text{H}_2\text{O}$ | \                  | Room temperature | 295.82                          |           |
|                                                                                                 | Neutral            | Room temperature | 316.04                          |           |
| InSnS-1                                                                                         | 1 M $\text{HNO}_3$ | Room temperature | 98.57                           | 11        |
| SbS-1K                                                                                          | 0-12               | 293 K            | 318.77                          | 13        |
| DIMS-2                                                                                          | 6.0                | 298.15           | 34.5                            | 14        |
| FJSM-GAS-1                                                                                      | 4-7                | \                | 164                             | 15        |
| NaMT-S20                                                                                        | 8.0                | 298 K            | 160.9                           | 16        |
| GAPP                                                                                            | 6.0                | 298.15 K         | 163.6                           | 17        |



## References

- 1 J. Ai, F. Y. Chen, C. Y. Gao, H. R. Tian, Q. J. Pan and Z. M. Sun, *Inorg. Chem.*, 2018, **57**, 4419-4426.
- 2 A. Baimenov, F. Montagnaro, V. J. Inglezakis and M. Balsamo, *Ind. Eng. Chem. Res.*, 2022, **61**, 8204-8219.
- 3 D. Ding, L. Cheng, K. Y. Wang, H. W. Liu, M. Sun and C. Wang, *Inorg. Chem.*, 2020, **59**, 9638-9647.
- 4 Y.-J. Gao, M.-L. Feng, B. Zhang, Z.-F. Wu, Y. Song and X.-Y. Huang, *J. Mater. Chem. A*, 2018, **6**, 3967-3976.
- 5 K. Jin, X. Q. Wu, Y. P. Chen, I. H. Park, J. R. Li and J. Park, *Inorg. Chem.*, 2022, **61**, 1918-1927.
- 6 J. Li, J. Jin, T. Zhang, W. Ma, X. Zeng, H. Sun, M. Cheng, M. Feng and X. Huang, *ACS EST Water*, 2021, **1**, 2440-2449.
- 7 J. Li, J. Jin, Y. Zou, H. Sun, X. Zeng, X. Huang, M. Feng and M. G. Kanatzidis, *ACS Appl. Mater. Interfaces*, 2021, **13**, 13434-13442.
- 8 W. A. Li, J. R. Li, B. Zhang, H. Y. Sun, J. C. Jin, X. Y. Huang and M. L. Feng, *ACS Appl. Mater. Interfaces*, 2021, **13**, 10191-10201.
- 9 Y. Y. Liao, J. R. Li, B. Zhang, H. Y. Sun, W. Ma, J. C. Jin, M. L. Feng and X. Y. Huang, *ACS Appl. Mater. Interfaces*, 2021, **13**, 5275-5283.
- 10 W. Ma, T. T. Lv, J. H. Tang, M. L. Feng and X. Y. Huang, *JACS Au*, 2022, **2**, 492-501.
- 11 J. H. Tang, J. C. Jin, W. A. Li, X. Zeng, W. Ma, J. L. Li, T. T. Lv, Y. C. Peng, M. L. Feng and X. Y. Huang, *Nat. Commun.*, 2022, **13**, 658.
- 12 X. Zeng, M. Zeng, P.-W. Cai, J.-H. Tang, W. Ma, M.-L. Feng and X.-Y. Huang, *Environ. Sci. Adv.*, 2022, **1**, 331-341.
- 13 Y. M. Zhao, L. Cheng, K. Y. Wang, X. Hao, J. Wang, J. Y. Zhu, M. Sun and C. Wang, *Adv Funct Mater*, 2022, **32**, 2112717.
- 14 L. Zhou, M. Xu, J. Yin, R. Shui, S. Yang and D. Hua, *ACS Appl. Mater. Interfaces*, 2021, **13**, 6322-6330.
- 15 M. L. Feng, D. Sarma, Y. J. Gao, X. H. Qi, W. A. Li, X. Y. Huang and M. G. Kanatzidis,

*J. Am. Chem. Soc.*, 2018, **140**, 11133-11140.

16 S. Chen, J. Hu, G. Mi, Y. Guo and T. Deng, *Green Energy Environ.*, 2021, **6**, 893-902.

17 S. Chen, J. Hu, Y. Guo and T. Deng, *Sci. Rep.*, 2020, **10**, 8221.
